# Supplementary material for: Engineering the T6SS of Pseudomonas for targeted delivery of antibacterial and antifungal effectors
Source: Research Square preprint supplement (doi:10.21203/rs.3.rs-5630977/v1), 2024-12-26
Supplement: Supplementary file 1 [file 1b3cd1009a7bbb0f362ac92e.docx]

**Table 1:** Plasmids used in this work.

| Plasmid | Descriptiona | Source or reference |
| --- | --- | --- |
| pRL662-gfp2 | Broad host range vector derived from pBBR1MCS-2 expressing a green fluorescence protein (gfp); GmR | Erh-Min Lai collection |
| pSEVA234 | Expression vector: oriV(pBBR1) lacI-Ptrc; inducible by IPTG; KmR | SEVA collection |
| pSEVA238 | Expression vector: oriV(pBBR1) XylS-Pm; inducible by 3-Methylbenzoate; KmR | SEVA collection |
| p234-Tse1 | pSEVA234 carrying *tse1* gene from *P. chlororaphis* PCL1606; KmR | **This work** |
| p234-PAAR-Tse1 | pSEVA234 carrying *paar*-*tse1* gene from *P. chlororaphis* PCL1606; KmR | **This work** |
| p238-VgrGkt4 | pSEVA238 carrying *vgrG4* gene from *P. putida* KT2440; KmR | **This work** |
| p238-VgrGkt4-TplE | pSEVA238 carrying *vgrG4* gene from *P. putida* KT2440 and PA1508-PA1510 from *P. aeruginosa* PAO1; KmR | **This work** |
| p234-VgrG1 | pSEVA234 carrying *vgrGsma* gene from *S. marcescens*; KmR | **This work** |
| p234-VgrG2 | pSEVA234 carrying *vgrGsmb* gene from *S. marcescens*; KmR | **This work** |
| p234-Tfe2 | pSEVA234 carrying *tfe2* gene from *S. marcescens*; KmR | **This work** |
| p234-VgrG1-Tfe2 | pSEVA234 carrying *vgrGsma and tfe2* genes from *S. marcescens*; KmR | **This work** |
| p234-VgrG2-Tfe2 | pSEVA234 carrying *vgrGsmb and tfe2* genes from *S. marcescens*; KmR | **This work** |
| pSEVA2213 | Expression vector: oriV(RK2) pEM7, KmR | SEVA collection |
| p2213-VgrG250J | pSEVA2213 carrying *vgrG250J* gene from *Pseudomonas* sp. 250J; KmR | **This work** |
| p2213-VgrG2a-csn | pSEVA2213 carrying *vgrGkt* gene from *P. putida* KT2440 and *csn* gene from *B. subtilis* NCIB3610; KmR | **This work** |
| p2213-VgrG250J-csn | pSEVA2213 carrying *vgrG250J* gene from *Pseudomonas* sp. 250J and *csn* gene from *B. subtilis* NCIB3610; KmR | **This work** |

aGmR, KmR, RifR, and NalR, resistance to gentamycin, kanamycin, rifampicin, and nalidixic acid, respectively.
