# Supplementary material for: Engineering the T6SS of Pseudomonas for targeted delivery of antibacterial and antifungal effectors
Source: Research Square preprint supplement (doi:10.21203/rs.3.rs-5630977/v1), 2024-12-26
Supplement: Supplementary file 2 [file af81bc6b8cdaf4313bae4508.xlsx]

## Sheet: Hoja1
Suppl. Table 2. Oligonucleotides used in this study.
p234-PAAR-Tse1 Fwd	agagtcgacctgcaggcatgcaaaggagGAAAGGACGATGTCAGGTAAAC
p234-PAAR-Tse1 Rev	tcccagtcacgacgcggccgcaCATTTGCTAATCCTTGCGGGAG
p238-VgrGkt4 Fwd	cgcgaattcgagctcggtacccgggaaggaggaaagggtATGCCCAGCCAAT CCGATCTGCGCT
p238-VgrGkt4 Rev	gcatgcctgcaggtcgactctagag TCAGCTTGCTCCTTCCATGCGAATGATG
p238-VgrGkt4(TplE) Fwd	tctagagtcgacctgcaggcatgcaaaggaggaaagggtATGCCCAGCCAATCCGATCTGCGCT
p238-VgrGkt4(TplE) Rev	gttcgctgctcatTCAGCTTGCTCCTTCCATGCGAATGATG
p238-TplE Fwd	ggagcaagctgaATGAGCAGCGAACCGCTCGAGCCGA
p238-TplE Rev	ttttcccagtcacgacgcggccgcaTCAGTTTTCGGCAGCGCCCAACGGG
p234-VgrG1 Fwd	tctagagtcgacctgcaggcatgcaaaggaggaaagggtATGTTGGATCGCATTATTGCGCACAC
p234-VgrG1 Rev	ttttcccagtcacgacgcggccgcaTCAGGATTTCGGGAACAGCTGATCG
p234-VgrG1(Tfe2) Fwd	agtcgacctgcaggcatgcaaaggaggaaagggtATGTTGGATCGCATTATTG
p234-VgrG1(Tfe2) Rev	ctaatggcatTCAGGATTTCGGGAACAG
p234-Tfe2(VgrG1) Fwd	gaaatcctgaATGCCATTAGAAGTCGATGG
p234-Tfe2(VgrG1) Rev	ccagtcacgacgcggccgcaTTATCCAGCCTGAGCCAG
p234-VgrG2 Fwd	tctagagtcgacctgcaggcatgcaaaggaggaaagggtATGCCTAAACCGGGGAATAGTATGG
p234-VgrG2 Rev	ttttcccagtcacgacgcggccgcaTTACAAGAAGATCGCCAGCGCCTTG
p234-VgrG2(Tfe2) Fwd	agtcgacctgcaggcatgcaaaggaggaaagggtATGCCTAAACCGGGGAATAG
p234-VgrG2(Tfe2) Rev	ctaatggcatTTACAAGAAGATCGCCAGC
p234-Tfe2(VgrG2) Fwd	cttcttgtaaATGCCATTAGAAGTCGATGG
p234-Tfe2(VgrG2) Rev	ccagtcacgacgcggccgcaTTATCCAGCCTGAGCCAG
p234-Tfe2 Fwd	tctagagtcgacctgcaggcatgcaaaggaggaaagggtATGCCATTAGAAGTCGATGGGATTATCAGAG
p234-Tfe2 Rev	ttttcccagtcacgacgcggccgcaTTATCCAGCCTGAGCCAGGTCGCTG
p2213-VgrG250J Fwd	ggccgcgcgaattcgagctcggtacaaggaggaaagggtATGCTGTTCAAGCAGTTCACGCGCC
p2213-VgrG250J Rev	tcgactctagaggatccccgggtacTTACTTGCTGGCGGCGGGGAAGAGG
p2213-VgrG250J(csn) Fwd	tctagagtcgacctgcaggcatgcaaaggaggaaagggtATGCTGTTCAAGCAGTTCACGCGCC
p2213-VgrG250J(csn) Rev	tactgattttcataccctttcctccttTTACTTGCTGGCGGCGGGGAAGAGG
p2213-csn Fwd	aaggaggaaagggtATGAAAATCAGTATGCAAAAAGCAG
p2213-csn Rev	ttttcccagtcacgacgcggccgcaTTATTTGATTACAAAATTACCGTACTC
p2213-VgrG2a(csn) Fwd	tctagagtcgacctgcaggcatgcaaaggaggaaagggtATGCGTCAAAGGGACCTGAAATTCAC
p2213-VgrG2a(csn) Rev	tactgattttcataccctttcctccttTCATGTGTTGGACTCCGTGTCGCTG
