# Supplementary material for: Engineering the T6SS of Pseudomonas for targeted delivery of antibacterial and antifungal effectors
Source: Research Square preprint supplement (doi:10.21203/rs.3.rs-5630977/v1), 2024-12-26
Supplement: Supplementary file 3 [file d77e684da9b28087b27584ee.docx]

**Table S1.** Bacterial strains used in this work

| Bacterial strain | Descriptiona | Source or reference |
| --- | --- | --- |
|  |  |  |
| ***E. coli*** |  |  |
| DH5α | supE44ΔlacU169 (φ80 lacZΔM15) hsdR1 recA1 endA1 gyrA96 thi-1 relA1; NalR | (Hanahan, 1983) |
|  |  |  |
| ***Pseudomonas*** |  |  |
| *P. putida* KT2440 | Wild-type strain | (Espinosa-Urgel, et al., 2000) |
| Δ*tssA1*Δ*tssM2*Δ*tssM3* (ΔT6SS) | Markerless KT2440R null mutant in the *tssA1/tssM2/tssM3* (PP3088/PP4071/PP2627) genes disabling all three T6SS clusters; RifR | (Bernal, et al., 2017) |
| *Pseudomonas* sp. 250J | Wild-type strain | (Molina-Santiago, et al., 2015) |
| *P. chlororaphis* PCL1606 | Wild-type strain | (Cazorla, et al., 2006) |
| *P. aeruginosa* PAO1 | Wild-type strain | Group Collection |
|  |  |  |
| ***Bacillus*** |  |  |
| *B. subtilis* NCIB 3610 | Wild-type strain | *Bacillus* Genetic Stock Center (BGSC) |
| *B. velezensis* FZB42 | Wild-type strain | *Bacillus* Genetic Stock Center (BGSC) |
|  |  |  |
| ***Serratia*** |  |  |
| *S. marcescens* ATCC 13880 | Wild-type strain | CECT (Spain) |
|  |  |  |
| *Aeromonas* |  |  |
| *A. hydrophila* DSM 30187 | Wild-type strain | DSMZ (Germany) |

aRifR, and NalR, resistance to rifampicin, and nalidixic acid, respectively.

**References**

Bernal, P., Allsopp, L.P., Filloux, A., and Llamas, M.A. (2017) The Pseudomonas putida T6SS is a plant warden against phytopathogens, *ISME J* **11**: 972-987.

Cazorla, F.M., Duckett, S.B., Bergstrom, E.T., Noreen, S., Odijk, R., Lugtenberg, B.J., et al. (2006) Biocontrol of avocado dematophora root rot by antagonistic Pseudomonas fluorescens PCL1606 correlates with the production of 2-hexyl 5-propyl resorcinol, *Mol Plant Microbe Interact* **19**: 418-428.

Espinosa-Urgel, M., Salido, A., and Ramos, J.L. (2000) Genetic analysis of functions involved in adhesion of Pseudomonas putida to seeds, *J Bacteriol* **182**: 2363-2369.

Hanahan, D. (1983) Studies on transformation of Escherichia coli with plasmids, *J Mol Biol* **166**: 557-580.

Molina-Santiago, C., Udaondo, Z., and Ramos, J.L. (2015) Draft whole-genome sequence of the antibiotic-producing soil isolate Pseudomonas sp. strain 250J, *Environ Microbiol Rep* **7**: 288-292.
